# Supplementary material for: Flexible crystals of perovskite-like coordination polymers with a tunable and switchable organic guest: (CH3NH3)2[KFe(CN)6] and (CH3NH3)2[KCo(CN)6]
Source: Royal Society of Chemistry journal article supplement (doi:10.1039/c6dt03915d), 2017-01-01
Supplement: c6dt03915d1.pdf [file c6dt03915d1.pdf]

*Supporting Information*

**Flexible crystals of perovskite-like coordination polymers with tunable and switchable organic guest:  $(\text{CH}_3\text{NH}_3)_2[\text{KFe}(\text{CN})_6]$  and  $(\text{CH}_3\text{NH}_3)_2[\text{KCo}(\text{CN})_6]$**

Joanna Kinga Prytys<sup>1</sup>, Magdalena Rok<sup>1\*</sup>, Vasyi Kinzhybalov<sup>2</sup>, Grażyna Bator<sup>1</sup>

<sup>1</sup> Faculty of Chemistry, University of Wrocław, Joliot-Curie 14, 50-383 Wrocław, Poland,

<sup>2</sup> Institute of Low Temperature and Structure Research, Polish Academy of Science, Okólna 2, PO Box 937, 50-950 Wrocław, Poland

**Caption of tables**

**Table 1S.** Summary of crystal data and structural refinements for  $(\text{CH}_3\text{NH}_3)_2[\text{KCo}(\text{CN})_6]$  at 100 and 443K temperatures.

**Table 2Sa.** Experimental bond lengths and angles for  $(\text{CH}_3\text{NH}_3)_2[\text{KCo}(\text{CN})_6]$  in LT phase. (Å, °)

**Table 2Sb.** Experimental bond lengths and angles for  $(\text{CH}_3\text{NH}_3)_2[\text{KCo}(\text{CN})_6]$  in HT phase. (Å, °)

**Table 3S.** Hydrogen bonds and short contacts for  $(\text{CH}_3\text{NH}_3)_2[\text{KCo}(\text{CN})_6]$  (**1**) and  $(\text{CH}_3\text{NH}_3)_2[\text{KCo}(\text{CN})_6]$  (**2**) in LT and HT phases.

**Table 4S.** Thermodynamic parameters of the phase transition for **1** and **2** in the condensed state.

**Caption of figures**

**Fig. 1S.** TGA and DTA thermograms between 300 and 900 K for (a)  $(\text{CH}_3\text{NH}_3)_2[\text{KCo}(\text{CN})_6]$  (**1**), (b)  $(\text{CH}_3\text{NH}_3)_2[\text{KFe}(\text{CN})_6]$  (**2**).

**Fig. 2S.** The temperature dependence of (a) the real part,  $\epsilon'$ , and (b) the imaginary part,  $\epsilon''$ , of the electric permittivity for the pure  $\text{K}_3\text{Co}(\text{CN})_6$  complex along the [10-1] direction.

**Fig. 3S.** The temperature dependence of (a) the real part,  $\epsilon'$ , and (b) the imaginary part,  $\epsilon''$ , of the electric permittivity for the pure  $\text{K}_3\text{Fe}(\text{CN})_6$  complex along the [10-1] direction.

**Fig. 4S.** The comparison of a) real and b) imaginary part of permittivity between the pure host ( $\text{K}_3\text{Fe}(\text{CN})_6$ ) and the guest-host crystals (**2**).

**Table 1S.** Summary of crystal data and structural refinements for  $(\text{CH}_3\text{NH}_3)_2[\text{KCo}(\text{CN})_6]$  at 100 and 443K temperatures.

| Complexes:                                          | $(\text{CH}_3\text{NH}_3)_2[\text{KCo}(\text{CN})_6]$<br>LT                 | $(\text{CH}_3\text{NH}_3)_2[\text{KCo}(\text{CN})_6]$<br>HT                 |
|-----------------------------------------------------|-----------------------------------------------------------------------------|-----------------------------------------------------------------------------|
| Formula                                             | $\text{C}_8\text{H}_{12}\text{N}_8\text{KCo}$                               | $\text{C}_8\text{H}_{12}\text{N}_8\text{KCo}$                               |
| Formula weight                                      | 318.29                                                                      | 318.29                                                                      |
| T (K)                                               | 100.00                                                                      | 443.15                                                                      |
| Crystal system                                      | monoclinic                                                                  | cubic                                                                       |
| Space group                                         | C2/c                                                                        | Fm-3m                                                                       |
| $a$ (Å)                                             | 13.626(5)                                                                   | 11.388(18)                                                                  |
| $b$ (Å)                                             | 7.821(3)                                                                    | 11.388(18)                                                                  |
| $c$ (Å)                                             | 13.610(5)                                                                   | 11.388(18)                                                                  |
| $\alpha$ (°)                                        | 90                                                                          | 90                                                                          |
| $\beta$ (°)                                         | 108.55(3)                                                                   | 90                                                                          |
| $\gamma$ (°)                                        | 90                                                                          | 90                                                                          |
| $V$ (Å <sup>3</sup> )                               | 1375.0(9)                                                                   | 1477.00(7)                                                                  |
| $Z$                                                 | 4                                                                           | 4                                                                           |
| Radiation type                                      | Mo K $\alpha$                                                               | Mo K $\alpha$                                                               |
| Crystal size (mm)                                   | 0.39 x 0.22 x 0.14                                                          | 0.33 x 0.32 x 0.2                                                           |
| Diffractometer                                      | Xcalibur, Ruby                                                              | Xcalibur, Sapphire 1                                                        |
| $\theta$ Range (°)                                  | 6.09 to 57.87                                                               | 6.196 to 52.374                                                             |
| $\rho_{\text{calc}}$ (g cm <sup>-3</sup> )          | 1.537                                                                       | 1.431                                                                       |
| Index ranges                                        | -14 $\leq$ h $\leq$ 17,<br>-8 $\leq$ k $\leq$ 10,<br>-16 $\leq$ l $\leq$ 18 | -14 $\leq$ h $\leq$ 13,<br>-8 $\leq$ k $\leq$ 14,<br>-14 $\leq$ l $\leq$ 14 |
| $\mu$ (Mo K $\alpha$ ) (mm <sup>-1</sup> )          | 1.55                                                                        | 1.440                                                                       |
| Absorption correction                               | Analytical                                                                  | Analytical                                                                  |
| T <sub>min</sub> , T <sub>max</sub>                 | 0.760, 0.838                                                                | 0.665, 0.766                                                                |
| No. of reflections collected                        | 3013                                                                        | 3079                                                                        |
| No. of independent reflections                      | 1562<br>[R <sub>int</sub> = 0.0227, R <sub>sigma</sub> = 0.0378]            | 104 [R <sub>int</sub> = 0.0241, R <sub>sigma</sub> = 0.0066]                |
| Goodness-of-fit on $F^2$                            | 1.065                                                                       | 1.280                                                                       |
| Final $R_1$ , $wR_2$ indices<br>[ $F > 4\sigma F$ ] | $R_1 = 0.0263$ , $wR_2 = 0.0609$                                            | $R_1 = 0.0702$ , $wR_2 = 0.1299$                                            |
| Final $R_1$ , $wR_2$ indices (all data)             | $R_1 = 0.0303$ , $wR_2 = 0.0647$                                            | $R_1 = 0.0702$ , $wR_2 = 0.1299$                                            |
| $\Delta\rho_{\text{max, min}}$ (e Å <sup>-3</sup> ) | 0.25, -0.43                                                                 | 0.75, -0.63                                                                 |

**Table 2Sa.** Experimental bond lengths and angles for  $(\text{CH}_3\text{NH}_3)_2[\text{KCo}(\text{CN})_6]$  in LT phase. ( $\text{\AA}$ ,  $^\circ$ )

| <b>Cordinate</b>                                   | <b>Experimental</b> |
|----------------------------------------------------|---------------------|
| <b><math>(\text{CH}_3\text{NH}_3)^+</math></b>     |                     |
| C(4) – N(4)                                        | 1.487(3)            |
| <b><math>[\text{KCo}(\text{CN})_6]^{2-}</math></b> |                     |
| Co(1) – C(2)                                       | 1.9008(18)          |
| Co(1) – C(2) <sup>1</sup>                          | 1.9008(18)          |
| Co(1) – C(1)                                       | 1.8986(18)          |
| Co(1) – C(1) <sup>1</sup>                          | 1.8986(18)          |
| Co(1) – C(3) <sup>1</sup>                          | 1.9073(18)          |
| Co(1) – C(3)                                       | 1.9073(18)          |
| N(2) – C(2)                                        | 1.153(2)            |
| N(2) – K(1)                                        | 2.8536(17)          |
| N(3) – C(3)                                        | 1.154(2)            |
| N(3) – K(1) <sup>2</sup>                           | 2.8186(17)          |
| N(1) – C(1)                                        | 1.153(2)            |
| N(1) – K(1) <sup>3</sup>                           | 2.8186(17)          |
| K(1) – N(2) <sup>4</sup>                           | 2.8535(17)          |
| K(1) <sup>5</sup> – N(3)                           | 2.8846(18)          |
| K(1) – N(3) <sup>6</sup>                           | 2.8846(18)          |
| K(1) – N(3) <sup>7</sup>                           | 2.8846(18)          |
| K(1) – N(1) <sup>8</sup>                           | 2.8186(17)          |
| C(2) <sup>1</sup> – Co(1) – C(2)                   | 180.00(10)          |
| C(2) – Co(1) – C(3)                                | 89.39(7)            |
| C(2) <sup>1</sup> – Co(1) – C(3)                   | 90.61(7)            |
| C(2) – Co(1) – C(3) <sup>1</sup>                   | 90.61(7)            |
| C(2) <sup>1</sup> – Co(1) – C(3) <sup>1</sup>      | 89.39(7)            |
| C(1) – Co(1) – C(2) <sup>1</sup>                   | 89.97(8)            |
| C(1) – Co(1) – C(2)                                | 90.03(8)            |
| C(1) <sup>1</sup> – Co(1) – C(2) <sup>1</sup>      | 90.03(8)            |
| C(1) <sup>1</sup> – Co(1) – C(2)                   | 89.97(8)            |
| C(1) <sup>1</sup> – Co(1) – C(1)                   | 180.0               |
| C(1) <sup>1</sup> – Co(1) – C(3) <sup>1</sup>      | 91.27(7)            |
| C(1) – Co(1) – C(3) <sup>1</sup>                   | 88.73(7)            |

|                          |            |
|--------------------------|------------|
| $C(1) - Co(1) - C(3)^1$  | 88.73(7)   |
| $C(1) - Co(1) - C(3)$    | 91.27(7)   |
| $C(3)^1 - Co(1) - C(3)$  | 180.0      |
| $C(2) - N(2) - K(1)$     | 138.97(12) |
| $C(3) - N(3) - K(1)^5$   | 152.85(13) |
| $N(2) - C(2) - Co(1)$    | 179.61(16) |
| $C(1) - N(1) - K(1)^2$   | 132.02(13) |
| $N(1) - C(1) - Co(1)$    | 178.49(16) |
| $N(3) - C(3) - Co(1)$    | 177.91(15) |
| $N(2)^4 - K(1) - N(2)$   | 169.69(6)  |
| $N(2) - K(1) - N(3)^7$   | 78.47(5)   |
| $N(2)^4 - K(1) - N(3)^7$ | 107.37(4)  |
| $N(2)^4 - K(1) - N(3)^6$ | 78.47(5)   |
| $N(2) - K(1) - N(3)^6$   | 107.38(5)  |
| $N(3)^7 - K(1) - N(3)^6$ | 113.23(7)  |
| $N(1)^8 - K(1) - N(2)^4$ | 96.67(5)   |
| $N(1)^8 - K(1) - N(2)$   | 75.80(5)   |
| $N(1)^3 - K(1) - N(2)$   | 96.67(5)   |
| $N(1)^3 - K(1) - N(2)^4$ | 75.80(5)   |
| $N(1)^3 - K(1) - N(3)^7$ | 84.60(5)   |
| $N(1)^8 - K(1) - N(3)^6$ | 84.60(5)   |
| $N(1)^8 - K(1) - N(3)^7$ | 152.23(4)  |
| $N(1)^3 - K(1) - N(3)^6$ | 152.23(4)  |
| $N(1)^3 - K(1) - N(1)^8$ | 88.14(7)   |

---

**symmetry codes:** (1)  $1/2-x, 1/2-y, -z$ ; (2)  $1/2+x, 1/2+y, +z$ ; (3)  $-1/2+x, -1/2+y, +z$ ;  
(4)  $-x, +y, 1/2-z$ ; (5)  $1/2+x, -1/2+y, +z$ ; (6)  $1/2-x, 1/2+y, 1/2-z$ ; (7)  $-1/2+x, 1/2+y, +z$ ;  
(8)  $1/2-x, -1/2+y, 1/2-z$ ;

---

**Table 2Sb.** Experimental bond lengths and angles for (CH<sub>3</sub>NH<sub>3</sub>)<sub>2</sub>[KCo(CN)<sub>6</sub>] in HT phase.  
(Å, °)

| Cordinate                                         | Experimental |
|---------------------------------------------------|--------------|
| <b>(CH<sub>3</sub>NH<sub>3</sub>)<sup>+</sup></b> |              |
| C(2) – N(2)                                       | 1.07(6)      |
| C(2) – N(2) <sup>1</sup>                          | 1.07(6)      |
| C(2) – N(2) <sup>2</sup>                          | 1.07(6)      |
| C(2) – N(2) <sup>3</sup>                          | 1.07(6)      |
| C(2) – N(2) <sup>4</sup>                          | 1.07(6)      |
| C(2) – N(2) <sup>5</sup>                          | 1.07(6)      |
| <b>[KCo(CN)<sub>6</sub>]<sup>2-</sup></b>         |              |
| Co(1) – C(1)                                      | 1.862(11)    |
| Co(1) – C(1) <sup>6</sup>                         | 1.862(11)    |
| Co(1) – C(1) <sup>7</sup>                         | 1.862(11)    |
| Co(1) – C(1) <sup>8</sup>                         | 1.862(11)    |
| Co(1) – C(1) <sup>9</sup>                         | 1.862(11)    |
| Co(1) – C(1) <sup>10</sup>                        | 1.862(11)    |
| K(1) – N(1)                                       | 2.716(12)    |
| K(1) – N(1) <sup>11</sup>                         | 2.716(12)    |
| K(1) – N(1) <sup>12</sup>                         | 2.716(12)    |
| K(1) – N(1) <sup>13</sup>                         | 2.716(12)    |
| K(1) – N(1) <sup>14</sup>                         | 2.716(12)    |
| K(1) – N(1) <sup>15</sup>                         | 2.716(12)    |
| C(2) – C(2) <sup>16</sup>                         | 1.57(10)     |
| C(2) – C(2) <sup>17</sup>                         | 1.57(10)     |
| C(2) – C(2) <sup>18</sup>                         | 1.57(10)     |
| N(1) – C(1)                                       | 1.116(16)    |
| C(1) – Co(1) – C(1) <sup>3</sup>                  | 90.0         |
| C(1) <sup>4</sup> – Co(1) – C(1) <sup>1</sup>     | 90.000(1)    |
| C(1) <sup>4</sup> – Co(1) – C(1) <sup>5</sup>     | 90.0         |
| C(1) – Co(1) – C(1) <sup>4</sup>                  | 180.0        |
| C(1) – Co(1) – C(1) <sup>5</sup>                  | 90.0         |
| C(1) <sup>3</sup> – Co(1) – C(1) <sup>4</sup>     | 90.0         |
| C(1) <sup>3</sup> – Co(1) – C(1) <sup>1</sup>     | 90.000(1)    |

|                                |             |
|--------------------------------|-------------|
| $C(1) - Co(1) - C(1)^2$        | 90.000(1)   |
| $C(1)^2 - Co(1) - C(1)^1$      | 180.0       |
| $C(1)^3 - Co(1) - C(1)^2$      | 90.0        |
| $C(1)^3 - Co(1) - C(1)^5$      | 180.0       |
| $C(1)^4 - Co(1) - C(1)^2$      | 90.0        |
| $C(1)^2 - Co(1) - C(1)^5$      | 90.0        |
| $C(1) - Co(1) - C(1)^1$        | 90.0        |
| $C(1)^1 - Co(1) - C(1)^5$      | 90.000(1)   |
| $N(1) - K(1) - N(1)^{10}$      | 90.000(2)   |
| $N(1)^9 - K(1) - N(1)^7$       | 180.0       |
| $N(1)^9 - K(1) - N(1)^6$       | 90.000(2)   |
| $N(1) - K(1) - N(1)^8$         | 180.0       |
| $N(1)^{10} - K(1) - N(1)^6$    | 180.0       |
| $N(1)^{10} - K(1) - N(1)^8$    | 90.000(1)   |
| $N(1)^8 - K(1) - N(1)^7$       | 90.0        |
| $N(1)^{10} - K(1) - N(1)^9$    | 90.000(1)   |
| $N(1) - K(1) - N(1)^6$         | 90.0        |
| $N(1)^8 - K(1) - N(1)^9$       | 90.000(1)   |
| $N(1)^8 - K(1) - N(1)^6$       | 90.000(2)   |
| $N(1) - K(1) - N(1)^6$         | 90.000(1)   |
| $N(1)^7 - K(1) - N(1)^6$       | 90.000(1)   |
| $N(1)^{10} - K(1) - N(1)^7$    | 90.000(2)   |
| $N(1) - K(1) - N(1)^9$         | 90.0        |
| $C(2)^{11} - C(2) - C(2)^{12}$ | 60.003(2)   |
| $C(2)^{13} - C(2) - C(2)^{11}$ | 60.001(1)   |
| $C(2)^{13} - C(2) - C(2)^{12}$ | 60.001(1)   |
| $N(2)^{15} - C(2) - C(2)^{11}$ | 144.734(11) |
| $N(2) - C(2) - C(2)^{12}$      | 144.734(16) |
| $N(2)^{15} - C(2) - C(2)^{13}$ | 144.74(3)   |
| $N(2) - C(2) - C(2)^{11}$      | 144.734(12) |
| $N(2)^{14} - C(2) - C(2)^{12}$ | 144.734(16) |
| $N(2)^{17} - C(2) - C(2)^{11}$ | 144.734(11) |
| $N(2)^{15} - C(2) - C(2)^{12}$ | 144.734(16) |
| $N(2)^{18} - C(2) - C(2)^{12}$ | 144.734(15) |

|                                |             |
|--------------------------------|-------------|
| $N(2)^{17} - C(2) - C(2)^{12}$ | 144.734(15) |
| $N(2)^{17} - C(2) - C(2)^{13}$ | 144.74(3)   |
| $N(2)^{16} - C(2) - C(2)^{12}$ | 144.734(16) |
| $N(2)^{14} - C(2) - C(2)^{13}$ | 144.74(3)   |
| $N(2) - C(2) - C(2)^{13}$      | 144.734(3)  |
| $N(2) - C(2) - C(2)^{14}$      | 144.734(11) |
| $N(2)^{18} - C(2) - C(2)^{13}$ | 144.74(3)   |
| $N(2)^{16} - C(2) - C(2)^{11}$ | 144.734(12) |
| $N(2)^{18} - C(2) - C(2)^{11}$ | 144.734(11) |
| $N(2)^3 - C(2) - C(2)^3$       | 144.735(16) |
| $N(2)^3 - N(2) - C(2)$         | 92(10)      |
| $N(2)^1 - N(2) - C(2)$         | 92(10)      |
| $N(2)^1 - N(2) - C(2)$         | 92(10)      |
| $N(2)^3 - N(2) - C(2)$         | 92(10)      |
| $N(1) - C(1) - Co(1)$          | 180.0       |
| $C(1) - N(1) - K(1)$           | 180.0       |

---

**symmetry codes:** (1) 1/2-x, 1/2-y, -z; (2) 1/2+x, -1/2+y, +z; (3) -x, 1/2-y, 1/2-z;  
(4) -x, 1-y, -z; (5) +x, -1/2+y, 1/2+z; (6) 1/2-x, 1-y, 1/2-z; (7) 1/2+x, -1/2+y, +z;  
(8) -x, 1-y, 1-z; (9) 1/2-x, 1/2-y, 1-z; (10) 1/2+x, +y, -1/2+z; (11) 1/2-x, 1/2-y, +z;  
(12) 1/2-x, +y, 1/2-z; (13) +x, 1/2-y, 1/2-z; (14) 1/2-x, 1/2-y, +z; (15) 1/2-x, +y, 1/2-z;  
(16) +x, +y, +z; (17) 1/2-x, 1/2-y, +z; (18) 1/2-x, +y, 1/2-z;

---

**Table 3S.** Hydrogen bonds and short contacts for (CH<sub>3</sub>NH<sub>3</sub>)<sub>2</sub>[KCo(CN)<sub>6</sub>] (**1**) and (CH<sub>3</sub>NH<sub>3</sub>)<sub>2</sub>[KCo(CN)<sub>6</sub>] (**2**) in LT and HT phases

| (CH <sub>3</sub> NH <sub>3</sub> ) <sub>2</sub> [KCo(CN) <sub>6</sub> ] |         |           |           |             |
|-------------------------------------------------------------------------|---------|-----------|-----------|-------------|
| LT                                                                      |         |           |           |             |
| D–H···A (Å)                                                             | D–H (Å) | H···A (Å) | D···A (Å) | D–H···A (°) |
| N(4)–H(4A)···N(2) <sup>1</sup>                                          | 0.85(2) | 2.14(2)   | 2.932(3)  | 155         |
| N(4)–H(4B)···N(3) <sup>2</sup>                                          | 0.81(2) | 2.42(2)   | 3.092(2)  | 141         |
| N(4)–H(4C)···N(1)                                                       | 0.88(2) | 2.10(2)   | 2.911(2)  | 153         |
| <b>symmetry codes:</b> (1) 1/2+x,1/2-y,1/2+z; (2) 1/2-x,1/2+y,1/2-z;    |         |           |           |             |
| (CH <sub>3</sub> NH <sub>3</sub> ) <sub>2</sub> [KCo(CN) <sub>6</sub> ] |         |           |           |             |
| HT                                                                      |         |           |           |             |
| D–H···A (Å)                                                             | D–H (Å) | H···A (Å) | D···A (Å) | D–H···A (°) |
| C(2)–H(2)···N(2) <sup>1</sup>                                           | 0.78(5) | 1.77(5)   | 2.52(7)   | 161         |
| <b>symmetry codes:</b> (1) 1/2-x,1+y,1/2-z;                             |         |           |           |             |



**Table 4S.** Thermodynamic parameters of the phase transition for **1** and **2** in the condensed state.

| <b>Compounds</b>                           | <b>(CH<sub>3</sub>NH<sub>3</sub>)<sub>2</sub>[KCo(CN)<sub>6</sub>]</b> | <b>(CH<sub>3</sub>NH<sub>3</sub>)<sub>2</sub>[KFe(CN)<sub>6</sub>]</b> |
|--------------------------------------------|------------------------------------------------------------------------|------------------------------------------------------------------------|
| M [g·mol <sup>-1</sup> ]                   | 318.3                                                                  | 315.2                                                                  |
| T <sub>c</sub> (heating) [K]               | 421.7                                                                  | 425.6                                                                  |
| ΔH [J·g <sup>-1</sup> ]                    | 59.2                                                                   | 60.9                                                                   |
| ΔH [kJ·mol <sup>-1</sup> ]                 | 18.8                                                                   | 19.2                                                                   |
| ΔS [J·mol <sup>-1</sup> ·K <sup>-1</sup> ] | 44.7                                                                   | 45.1                                                                   |
| <i>N</i>                                   | 14.7                                                                   | 15.1                                                                   |

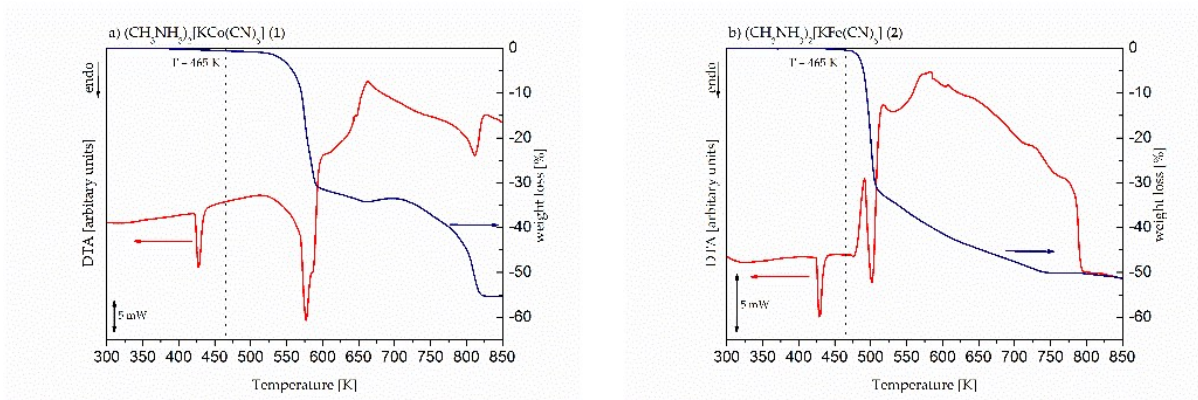

**Fig. 1S.** TGA and DTA thermograms between 300 and 900 K for (a)  $(\text{CH}_3\text{NH}_3)_2[\text{KCo}(\text{CN})_6]$  (**1**), (b)  $(\text{CH}_3\text{NH}_3)_2[\text{KFe}(\text{CN})_6]$  (**2**).

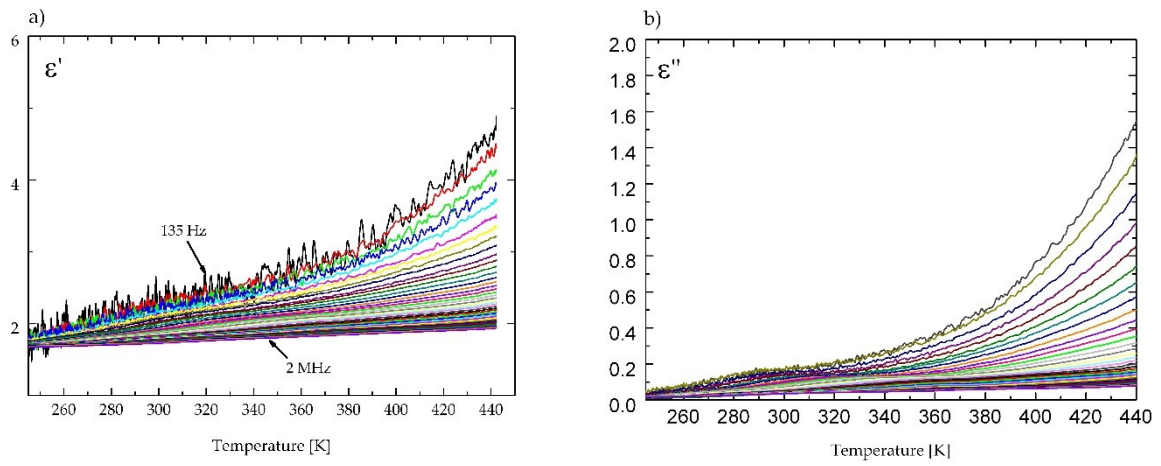

**Fig. 2S.** The temperature dependence of (a) the real part,  $\epsilon'$ , and (b) the imaginary part,  $\epsilon''$ , of the electric permittivity for the pure  $K_3Co(CN)_6$  complex along the  $[10-1]$  direction.

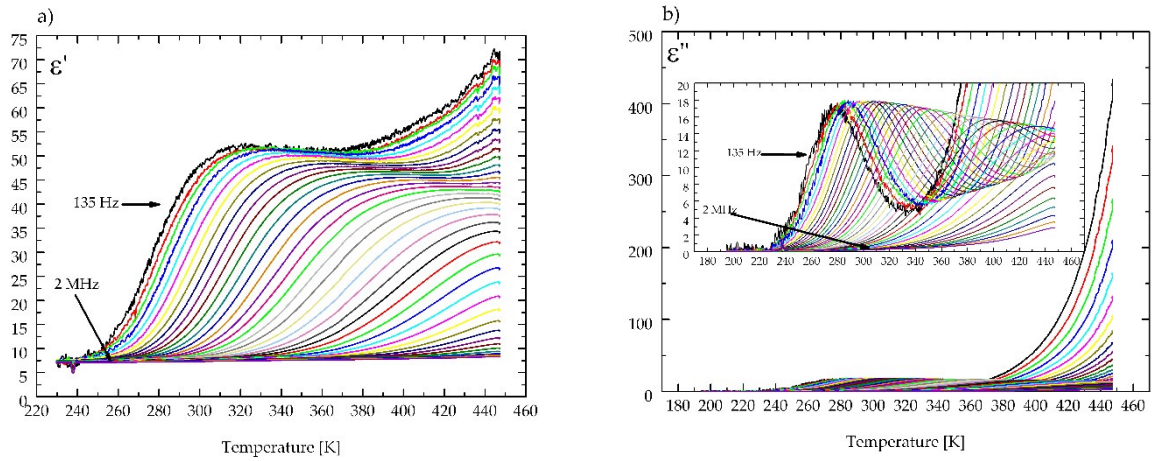

**Fig. 3S.** The temperature dependence of (a) the real part,  $\epsilon'$ , and (b) the imaginary part,  $\epsilon''$ , of the electric permittivity for the pure  $K_3Fe(CN)_6$  complex along the  $[10\bar{1}]$  direction.

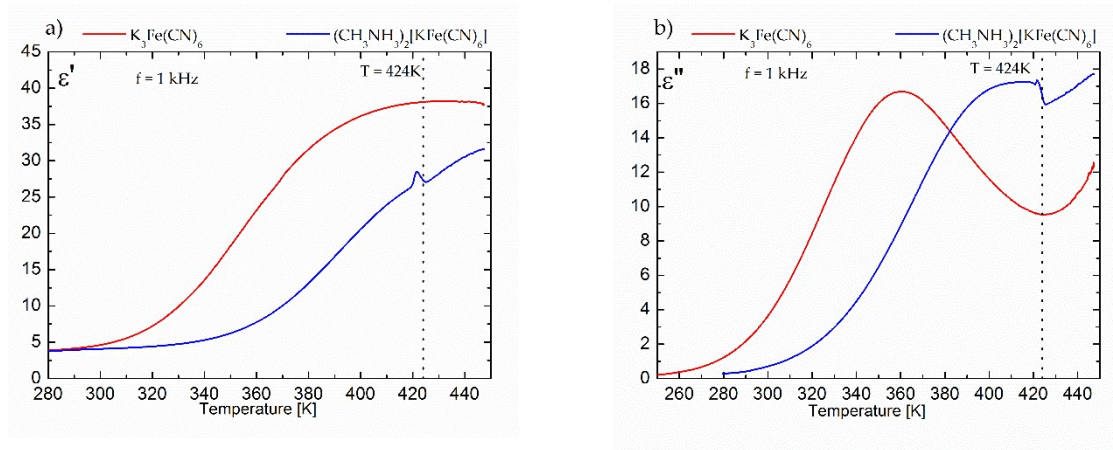

**Fig. 4S.** The comparison of a) real and b) imaginary part of permittivity between the pure host  $\text{K}_3\text{Fe}(\text{CN})_6$  and the guest-host crystals (**2**).
